# Supplementary material
Source: Springer Nature journal article supplement (https://www.springermedizin.de/resource/supplementary/13229_2013_106_MOESM9_ESM.pdf/9676186)

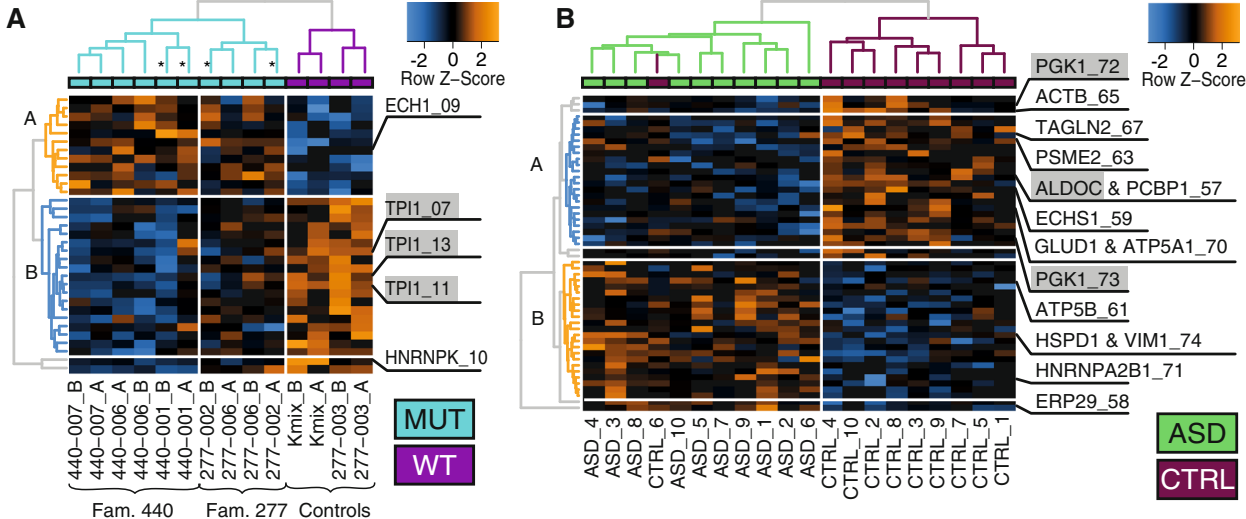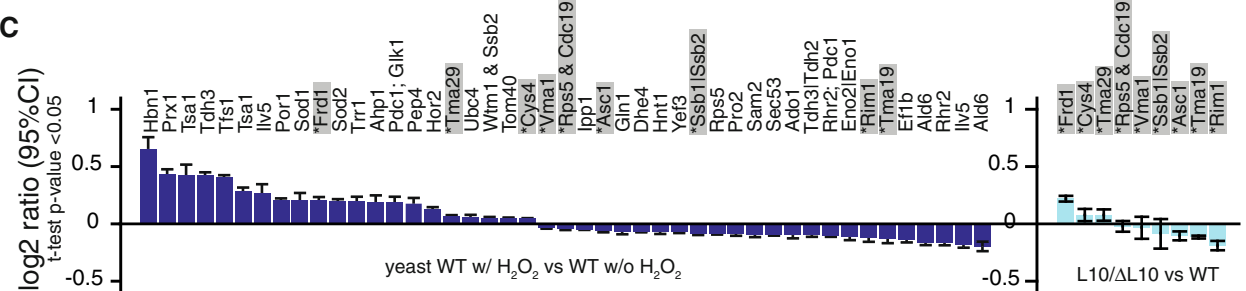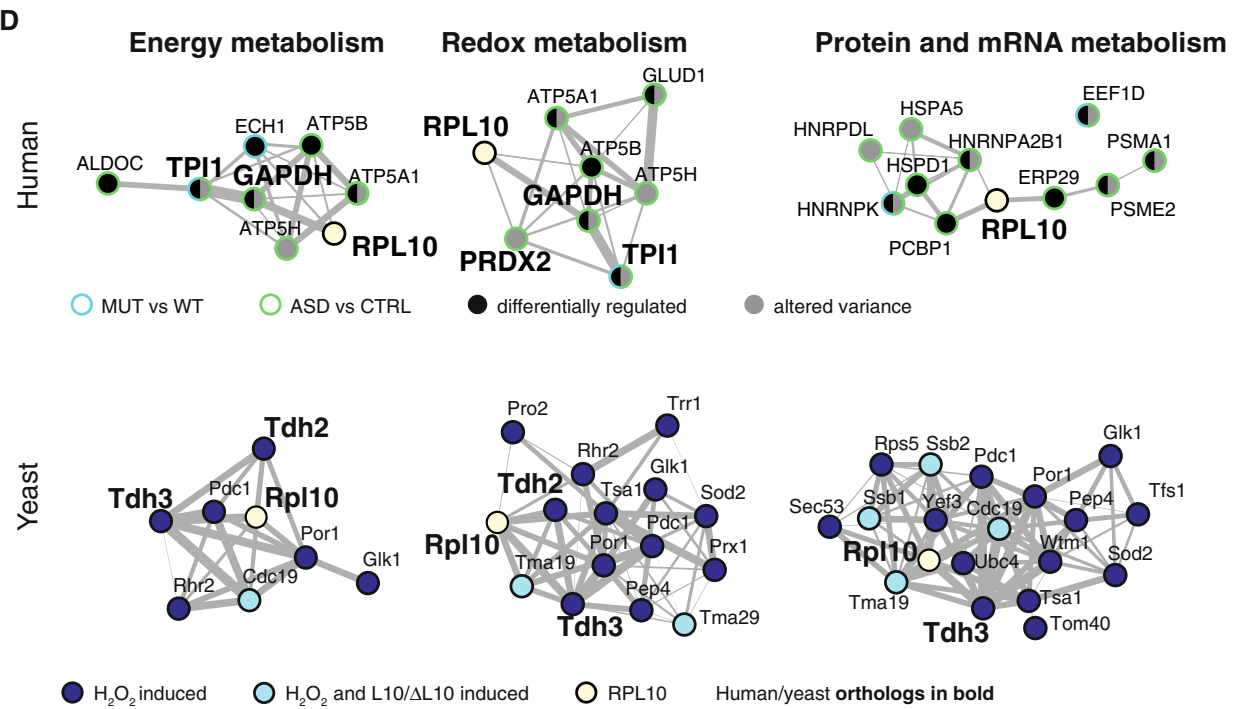

Supplement: MOESM9 [file 9676186]
